# Supplementary material for: PRMT1 Is Required for the Maintenance of Mature β-Cell Identity
Source: Oxford University Press journal article supplement (doi:10.2337/db19-0685), 2019-12-18
Supplement: db190685supplementarydata4.xlsx [file db190685supplementarydata4.xlsx]

## Sheet: Correlation analysis_Gene list
	Correlation analysis_beta cell gene list							Correlation analysis_OXPHOS gene list
	PeakID	log2FC_ATACseq	Genes	dataset	log2FC_RNAseq			PeakID	log2FC_ATACseq	Genes	dataset	log2FC_RNAseq
	./_peak_27404	-2.54064	Ins1	beta	-3.00373			./_peak_44563	-2.41533	Ndufa3	oxphos	-2.70134
	./_peak_24812	-2.76291	Egr1	beta	-2.61063			./_peak_22677	-3.03538	Ndufa7	oxphos	-2.43295
	./_peak_24813	-2.29768	Egr1	beta	-2.61063			./_peak_52167	-1.99376	Cox7a2	oxphos	-2.4002
	./_peak_11414	-1.90518	Fos	beta	-2.47164			./_peak_27199	-1.82868	Ndufb8	oxphos	-2.31259
	./_peak_11413	-2.04641	Fos	beta	-2.47164			./_peak_5966	-1.86394	Ndufa12	oxphos	-2.23757
	./_peak_30879	-2.62714	Id1	beta	-2.46707			./_peak_54171	-1.85066	Cox7b	oxphos	-2.22399
	./_peak_32722	-2.03017	P2ry1	beta	-2.42468			./_peak_45210	-1.08329	Cox6b1	oxphos	-2.21508
	./_peak_38905	-2.4677	Mnx1	beta	-2.3762			./_peak_5577	-1.26784	Uqcr11	oxphos	-2.14
	./_peak_38906	-1.99019	Mnx1	beta	-2.3762			./_peak_41769	-1.29222	Ndufa4	oxphos	-2.13497
	./_peak_48993	-2.90555	Rab3a	beta	-2.23946			./_peak_47128	-1.52976	Ndufab1	oxphos	-2.07889
	./_peak_4113	-2.27997	Cited2	beta	-2.15768			./_peak_53641	-1.27596	Ndufa1	oxphos	-2.01552
	./_peak_4111	-2.06295	Cited2	beta	-2.15768			./_peak_20550	-1.17048	Cox17	oxphos	-1.90626
	./_peak_4112	-1.65813	Cited2	beta	-2.15768			./_peak_42021	-1.26303	Ndufa5	oxphos	-1.87913
	./_peak_29096	-2.0645	G6pc2	beta	-2.15626			./_peak_6988	-1.25576	Uqcr10	oxphos	-1.84
	./_peak_29095	-1.72214	G6pc2	beta	-2.15626			./_peak_8894	-1.4293	Atp5g1	oxphos	-1.80148
	./_peak_1257	-1.39795	Fev	beta	-2.0782			./_peak_26152	-1.42161	Ndufs8	oxphos	-1.77814
	./_peak_30775	-1.3813	Foxa2	beta	-2.0522			./_peak_51394	-1.08449	Atp5l	oxphos	-1.77206
	./_peak_30633	-1.64587	Pcsk2	beta	-1.93613			./_peak_13661	-1.04799	Uqcrb	oxphos	-1.76
	./_peak_47653	-1.3454	Ins2	beta	-1.84265			./_peak_40623	-1.50729	Cox6a1	oxphos	-1.74376
	./_peak_37718	-1.66689	Id3	beta	-1.81242			./_peak_3087	-1.39237	Sdhc	oxphos	-1.73158
	./_peak_26296	-1.14102	Men1	beta	-1.69782			./_peak_28164	-1.27405	Surf1	oxphos	-1.72
	./_peak_45231	-1.62534	Lsr	beta	-1.60388			./_peak_13803	-1.3547	Ndufs6	oxphos	-1.69067
	./_peak_53343	-1.42303	Syp	beta	-1.42705			./_peak_48938	-1.40393	Ndufa13	oxphos	-1.68565
	./_peak_41452	-2.35533	Pdx1	beta	-1.42254			./_peak_28473	-1.24577	Ndufa8	oxphos	-1.67997
	./_peak_44078	-1.06093	Ccnd2	beta	-1.39412			./_peak_21410	-1.12755	Atp5j	oxphos	-1.67111
	./_peak_18318	-1.50674	Rad21	beta	-1.37087			./_peak_44071	-0.916935	Ndufa9	oxphos	-1.60402
	./_peak_13768	-1.05111	Irx1	beta	-1.35447			./_peak_9499	-1.41889	Atp5h	oxphos	-1.59717
	./_peak_20319	-1.47696	Hes1	beta	-1.34584			./_peak_9498	-1.63695	Atp5h	oxphos	-1.59717
	./_peak_20318	-1.03673	Hes1	beta	-1.34584			./_peak_23435	-1.5775	Ndufv2	oxphos	-1.5968
	./_peak_49468	-0.994357	Rbl2	beta	-1.33887			./_peak_19095	-1.51701	Ndufa6	oxphos	-1.58433
	./_peak_44225	-1.35525	Cdkn1b	beta	-1.33648			./_peak_32159	-1.02169	Ndufb5	oxphos	-1.56604
	./_peak_39864	-1.39618	Hopx	beta	-1.27113			./_peak_42345	-1.53609	Ndufb2	oxphos	-1.53236
	./_peak_39865	-2.32169	Hopx	beta	-1.27113			./_peak_21621	-1.28708	Atp5o	oxphos	-1.50827
	./_peak_39862	-1.07519	Hopx	beta	-1.27113			./_peak_21622	-1.22424	Atp5o	oxphos	-1.50827
	./_peak_52024	-1.60787	Rab27a	beta	-1.26384			./_peak_6815	-1.30015	Atp5b	oxphos	-1.44363
	./_peak_52025	-1.14232	Rab27a	beta	-1.26384			./_peak_12983	-1.13863	Uqcrfs1	oxphos	-1.39155
	./_peak_40969	-1.63441	Gusb	beta	-1.21799			./_peak_29220	-1.04407	Atp5g3	oxphos	-1.34106
	./_peak_11838	-0.990464	Chga	beta	-1.09508			./_peak_53559	-1.42379	Ndufb11	oxphos	-1.33581
	./_peak_11101	-1.52865	Six4	beta	-1.06961			./_peak_26329	-1.32932	Cox8a	oxphos	-1.26821
	./_peak_11102	-2.40288	Six4	beta	-1.06961			./_peak_50188	-1.35977	Cox4i1	oxphos	-1.22293
	./_peak_40255	-1.39564	Nkx6-1	beta	-0.988603			./_peak_25840	-1.55585	Atp5a1	oxphos	-1.04759
